# Supplementary material
Source: ML conference proceedings conference paper supplement (https://proceedings.neurips.cc/paper_files/paper/2021/hash/35309226eb45ec366ca86a4329a2b7c3-Abstract.html)
Supplement: Supplementary file [file 35309226eb45ec366ca86a4329a2b7c3-Supplemental.pdf]

## A Performer architecture details

We define the Performer architecture formally as follows.  $\mathbf{X}^{(out)} = \mathbf{X}^{(s)}\mathbf{W}^{(out)} + \mathbf{b}^{(out)}$  and for each  $1 \leq r \leq s$ :

$$\mathbf{H}^{(r-1)} = \text{LN}(\text{MultiHead-Att}(\mathbf{X}^{(r-1)})) + \mathbf{X}^{(r-1)}, \quad (11)$$

$$\mathbf{X}^{(r)} = \text{LN}(\text{FFN}(\mathbf{H}^{(r-1)})) + \mathbf{H}^{(r-1)}, \text{ where} \quad (12)$$

$$\text{MultiHead-Att}(\bar{\mathbf{X}}) = [\mathbf{H}^{(1)} \dots \mathbf{H}^{(k)}], \quad (13)$$

$$\forall j \leq k : \mathbf{H}^{(j)} = \text{Att}(\bar{\mathbf{X}}\mathbf{W}_Q^{(j)}, \bar{\mathbf{X}}\mathbf{W}_K^{(j)}, \bar{\mathbf{X}}\mathbf{W}_V^{(j)}), \quad (14)$$

$$\text{FFN}(\bar{\mathbf{H}}) = \text{GeLU}(\bar{\mathbf{H}}\mathbf{W}^{(1)} + \mathbf{b}^{(1)})\mathbf{W}^{(2)} + \mathbf{b}^{(2)}. \quad (15)$$

Here  $k$  is the number of attention heads ( $d_{model} = kd$ ).  $\mathbf{W}^{(out)} \in \mathbb{R}^{d_{model} \times |\Sigma|}$ ,  $\mathbf{b}^{(out)} \in \mathbb{R}^{1 \times |\Sigma|}$ ,  $\mathbf{W}^{(1)} \in \mathbb{R}^{d_{model} \times d_{ff}}$ ,  $\mathbf{b}^{(1)} \in \mathbb{R}^{1 \times d_{ff}}$ ,  $\mathbf{W}^{(2)} \in \mathbb{R}^{d_{ff} \times d_{model}}$ ,  $\mathbf{b}^{(2)} \in \mathbb{R}^{1 \times d_{model}}$ ,  $\mathbf{W}_Q^{(j)}, \mathbf{W}_K^{(j)}, \mathbf{W}_V^{(j)} \in \mathbb{R}^{d_{model} \times d}$  are trainable parameters (separate for each instance of MultiHead-Att, FFN), “+” is broadcasted rowwise when biases are added and LN is layer normalization [2], which is applied rowwise and depends on additional trainable parameters. GeLU denotes Gaussian error Linear Unit [16], which is applied elementwise.

## B Derivation of Gradient Expressions

$\theta^{(n)}$  doesn’t affect terms  $\mathcal{L}^{(1)}(\mathbf{X}^{(out,1)}), \dots, \mathcal{L}^{(n-1)}(\mathbf{X}^{(out,n)})$ , so corresponding gradients are zero:

$$\nabla_{\theta^{(n)}} \mathcal{L} = \nabla_{\theta^{(n)}} \sum_{n'=n}^N \mathcal{L}^{(n')}(\mathbf{X}^{(out,n')}).$$

Similarly,  $\mathcal{U}^{(n)}$  does not affect  $\mathcal{L}^{(1)}, \dots, \mathcal{L}^{(n)}$ , so

$$\mathcal{G}^{(n)} = \nabla_{\mathcal{U}^{(n)}} \mathcal{L} = \nabla_{\mathcal{U}^{(n)}} \sum_{n'=n+1}^N \mathcal{L}^{(n')}(\mathbf{X}^{(out,n')}).$$

In particular,

$$\mathcal{G}^{(N)} = \nabla_{\mathcal{U}^{(N)}} \mathcal{L} = \mathbf{0}_{r \times D_1}.$$

For all  $1 \leq n < n' \leq N$ ,  $\theta^{(n)}$  and  $\mathcal{U}^{(n-1)}$  affect  $\mathcal{L}^{(n')}$  only through  $\mathcal{U}^{(n)}$ , so according to the chain rule

$$\begin{aligned} \nabla_{\theta^{(n)}} \sum_{n'=n+1}^N \mathcal{L}^{(n')}(\mathbf{X}^{(out,n')}) &= \sum_{r=1}^s \frac{\partial \mathcal{U}_r^{(n)}}{\partial \theta^{(n)}} \times \nabla_{\mathcal{U}_r^{(n)}} \sum_{n'=n+1}^N \mathcal{L}^{(n')}(\mathbf{X}^{(out,n')}) \\ &= \sum_{r=1}^s \frac{\partial \mathcal{U}_r^{(n)}}{\partial \theta^{(n)}} \times \nabla_{\mathcal{U}_r^{(n)}} \mathcal{L}, \end{aligned}$$

$$\begin{aligned} \forall 1 \leq r' \leq s : \nabla_{\mathcal{U}_{r'}^{(n-1)}} \sum_{n'=n+1}^N \mathcal{L}^{(n')}(\mathbf{X}^{(out,n')}) &= \sum_{r=1}^s \frac{\partial \mathcal{U}_r^{(n)}}{\partial \mathcal{U}_{r'}^{(n-1)}} \times \nabla_{\mathcal{U}_r^{(n)}} \sum_{n'=n+1}^N \mathcal{L}^{(n')}(\mathbf{X}^{(out,n')}) \\ &= \sum_{r=1}^s \frac{\partial \mathcal{U}_r^{(n)}}{\partial \mathcal{U}_{r'}^{(n-1)}} \times \nabla_{\mathcal{U}_r^{(n)}} \mathcal{L}, \end{aligned}$$

where  $\frac{\partial \square}{\partial \square}$  denotes Jacobian matrices. Further, for all  $1 \leq r \leq s$ :

$$\frac{\partial \mathcal{U}_r^{(n)}}{\partial \square} \times \nabla_{\mathcal{U}_r^{(n)}} \mathcal{L} = \nabla_{\square} \left( [\mathcal{U}_r^{(n)}]^\top \langle \nabla_{\mathcal{U}_r^{(n)}} \mathcal{L} \rangle \right),$$

where  $\square \in \{\theta^{(n)}\} \cup \{\mathcal{U}_{r'}^{(n-1)}\}_{1 \leq r' \leq s}$ .  $\langle \langle \cdot \rangle \rangle$  denotes a *stop-gradient* operator, i.e. gradients are not propagated inside brackets and the argument is considered as constant.

We conclude that

$$\begin{aligned}
\nabla_{\theta^{(n)}} \mathcal{L} &= \nabla_{\theta^{(n)}} \mathcal{L}^{(n)}(\mathbf{X}^{(out,n)}) + \nabla_{\theta^{(n)}} \sum_{n'=n+1}^N \mathcal{L}^{(n')}(\mathbf{X}^{(out,n')}) = \nabla_{\theta^{(n)}} \mathcal{L}^{(n)}(\mathbf{X}^{(out,n)}) \\
&\quad + \sum_{r=1}^s \frac{\partial \mathcal{U}_r^{(n)}}{\partial \theta^{(n)}} \times \nabla_{\mathcal{U}_r^{(n)}} \mathcal{L} \\
&= \nabla_{\theta^{(n)}} \left( \mathcal{L}^{(n)}(\mathbf{X}^{(out,n)}) + \sum_{r=1}^s [\mathcal{U}_r^{(n)}]^\top \langle \langle \nabla_{\mathcal{U}_r^{(n)}} \mathcal{L} \rangle \rangle \right) = \nabla_{\theta^{(n)}} \Phi^{(n)}(\theta^{(u)}, \mathcal{U}^{(n-1)}, \nabla_{\mathcal{U}^{(n)}} \mathcal{L}) \\
&= \nabla_{\theta^{(n)}} \Phi^{(n)}(\theta^{(u)}, \mathcal{U}^{(n-1)}, \mathcal{G}^{(n)}), \\
\forall 1 \leq r' \leq s : \mathcal{G}_{r'}^{(n-1)} &= \nabla_{\mathcal{U}_{r'}^{(n-1)}} \mathcal{L} = \nabla_{\mathcal{U}_{r'}^{(n-1)}} \mathcal{L}^{(n)}(\mathbf{X}^{(out,n)}) + \nabla_{\mathcal{U}_{r'}^{(n-1)}} \sum_{n'=n+1}^N \mathcal{L}^{(n')}(\mathbf{X}^{(out,n')}) \\
&= \nabla_{\mathcal{U}_{r'}^{(n-1)}} \mathcal{L}^{(n)}(\mathbf{X}^{(out,n)}) + \sum_{r=1}^s \frac{\partial \mathcal{U}_r^{(n)}}{\partial \mathcal{U}_{r'}^{(n-1)}} \times \nabla_{\mathcal{U}_r^{(n)}} \mathcal{L} \\
&= \nabla_{\mathcal{U}_{r'}^{(n-1)}} \left( \mathcal{L}^{(n)}(\mathbf{X}^{(out,n)}) + \sum_{r=1}^s \nabla_{\square} [\mathcal{U}_r^{(n)}]^\top \langle \langle \nabla_{\mathcal{U}_r^{(n)}} \mathcal{L} \rangle \rangle \right) \\
&= \nabla_{\mathcal{U}_{r'}^{(n-1)}} \Phi^{(n)}(\theta^{(n)}, \mathcal{U}^{(n-1)}, \nabla_{\mathcal{U}^{(n)}} \mathcal{L}) \\
&= \nabla_{\mathcal{U}_{r'}^{(n-1)}} \Phi^{(n)}(\theta^{(n)}, \mathcal{U}^{(n-1)}, \mathcal{G}^{(n)}),
\end{aligned}$$

where the second chain of equalities is equivalent to (10).

### C Efficient ‘‘Block’’ Computation of (2-3)

Denote  $\tilde{\mathbf{Q}} = (g(\mathbf{Q}_l))_{l=1}^L$ ,  $\tilde{\mathbf{K}} = (g(\mathbf{K}_l))_{l=1}^L$ ,  $\mathbf{N} = (\mathbf{R}_l \times \tilde{\mathbf{Q}}_l)_{l=1}^L$ ,  $\mathbf{D} = (\mathbf{S}_l^\top \tilde{\mathbf{Q}}_l)_{l=1}^L$ . [18] propose the following algorithm for computation of (2-3). Initialize buffers  $\text{cur}\mathbf{R} = \mathbf{0}_{d \times M}$ ,  $\text{cur}\mathbf{S} = \mathbf{0}_M$ , iterate over  $l = 1, \dots, L$  and compute

$$\begin{aligned}
\text{cur}\mathbf{R} &:= \text{cur}\mathbf{R} + \mathbf{V}_l \times \tilde{\mathbf{K}}_l^\top; \\
\text{cur}\mathbf{S} &:= \text{cur}\mathbf{S} + \tilde{\mathbf{K}}_l; \\
\mathbf{N}_l &:= \text{cur}\mathbf{R} \times \tilde{\mathbf{Q}}_l; \\
\mathbf{D}_l &:= \text{cur}\mathbf{S}^\top \times \tilde{\mathbf{Q}}_l; \\
\mathbf{Y}_l &:= \mathbf{N}_l / \mathbf{D}_l.
\end{aligned}$$

This way, the 3D tensor  $\mathbf{R} \in \mathbb{R}^{L \times d \times M}$  is not stored in memory explicitly, resulting in  $O(L)$  time and  $O(L(d+M) + dM)$  memory complexity. In order to have the same memory consumption during back-propagation, [18] propose the following routine. Keep buffers  $\text{cur}\mathbf{R}$ ,  $\text{cur}\mathbf{S}$  as the result of forward pass, and initialize gradient buffers  $\text{grad}\mathbf{R} = \mathbf{0}_{d \times M}$ ,  $\text{grad}\mathbf{S} = \mathbf{0}_M$ . Assuming that  $\nabla_{\mathbf{N}} \mathcal{L} \in \mathbb{R}^{L \times d}$ ,  $\nabla_{\mathbf{D}} \mathcal{L} \in \mathbb{R}^L$  are computed using automatic differentiation, iterate in a backward direction  $l = L, \dots, 1$  and compute

$$\begin{aligned}
\nabla_{\tilde{\mathbf{Q}}_l} \mathcal{L} &:= (\nabla_{\mathbf{D}_l} \mathcal{L}) \cdot \text{cur}\mathbf{S} + \text{cur}\mathbf{R}^\top \times \nabla_{\mathbf{N}_l} \mathcal{L}; \\
\text{cur}\mathbf{R} &:= \text{cur}\mathbf{R} - \mathbf{V}_l \times \tilde{\mathbf{K}}_l^\top; \\
\text{cur}\mathbf{S} &:= \text{cur}\mathbf{S} - \tilde{\mathbf{K}}_l; \\
\text{grad}\mathbf{R} &:= \text{grad}\mathbf{R} + (\nabla_{\mathbf{N}_l} \mathcal{L}) \times \tilde{\mathbf{Q}}_l^\top; \\
\text{grad}\mathbf{S} &:= \text{grad}\mathbf{S} + (\nabla_{\mathbf{D}_l} \mathcal{L}) \cdot \tilde{\mathbf{Q}}_l; \\
\nabla_{\mathbf{V}_l} \mathcal{L} &:= \text{grad}\mathbf{R} \times \tilde{\mathbf{K}}_l; \\
\nabla_{\tilde{\mathbf{K}}_l} \mathcal{L} &:= \text{grad}\mathbf{R}^\top \times \mathbf{V}_l.
\end{aligned}$$

In practice, the described algorithm works slowly when implemented in pure PyTorch, because  $l$  is iterated one-by-one: [18] use low-level CUDA extensions to make the algorithm practical. Instead, we propose a “block” version, when we iterate through blocks of  $l$  of a small size  $\mathcal{C}$  (we use  $\mathcal{C} = 64$ ). In each block we use explicit prefix sums on inputs of length  $\mathcal{C}$  to find  $\mathbf{Y}_{l:l+\mathcal{C}-1}$ , using the maintained front  $\text{cur}\mathbf{R}$ ,  $\text{cur}\mathbf{S}$ . The formal algorithm is as follows. Initialize buffers  $\text{cur}\mathbf{R} = \mathbf{0}_{d \times M}$ ,  $\text{cur}\mathbf{S} = \mathbf{0}_M$ . For simplicity assuming that  $\mathcal{C}$  divides  $L$  (extension for an opposite case is straightforward), iterate over  $l = 1, \mathcal{C} + 1, \dots, L - \mathcal{C} + 1$  and compute

$$\text{block}\mathbf{R} := \text{PS}((\mathbf{V}_{l+l'-1} \times \tilde{\mathbf{K}}_{l+l'-1}^\top)_{l'=1}^{\mathcal{C}}); \quad (16)$$

$$\text{block}\mathbf{R} := (\text{cur}\mathbf{R} + \text{block}\mathbf{R}_{l'})_{l'=1}^{\mathcal{C}};$$

$$\text{block}\mathbf{S} := \text{PS}((\tilde{\mathbf{K}}_{l+l'-1})_{l'=1}^{\mathcal{C}}); \quad (17)$$

$$\text{block}\mathbf{S} := (\text{cur}\mathbf{S} + \text{block}\mathbf{S}_{l'})_{l'=1}^{\mathcal{C}};$$

$$\text{cur}\mathbf{R} := \text{block}\mathbf{R}_{\mathcal{C}};$$

$$\text{cur}\mathbf{S} := \text{block}\mathbf{S}_{\mathcal{C}};$$

$$\mathbf{N}_{l:l+\mathcal{C}-1} := (\text{block}\mathbf{R}_{l'} \times \tilde{\mathbf{Q}}_{l+l'-1})_{l'=1}^{\mathcal{C}};$$

$$\mathbf{D}_{l:l+\mathcal{C}-1} := (\text{block}\mathbf{S}_{l'}^\top \times \tilde{\mathbf{Q}}_{l+l'-1})_{l'=1}^{\mathcal{C}};$$

$$\mathbf{Y}_{l:l+\mathcal{C}-1} := (\mathbf{N}_{l+l'-1} / \mathbf{D}_{l+l'-1})_{l'=1}^{\mathcal{C}}.$$

In the “block” version, the number of outer sequential iterations is reduced to  $L/\mathcal{C}$ , resulting in  $O((L/\mathcal{C}) \log \mathcal{C})$  parallel time complexity, when the logarithmic parallel algorithm is used to compute prefix sums (16,17). In our experiments, we use `torch.cumsum` to compute (16,17), which works fast in practice. The memory complexity of the algorithm is  $O(L(d+M) + \mathcal{C}dM)$ , where the second term is for storing  $\text{block}\mathbf{R}$ . Assuming that  $\mathcal{C}$  is a small constant ( $\mathcal{C} = O(1)$ ), we conclude that the “block” version has  $O(L(d+M) + dM)$  memory and  $O(L)$  time complexity – same as the algorithm of [18]. As for hidden constants in complexity estimates, the constant inside  $O(L)$  time complexity is reduced at the cost of increasing constant of the “small”  $dM$  term in the memory complexity (when  $d, M \ll L$ ), making the “block” iterative algorithm a practical choice for computing (2-3).

We further show how to back-propagate through (2-3) in  $O((L/\mathcal{C}) \log \mathcal{C})$  time and  $O(L(d+M) + \mathcal{C}dM)$  memory. Again, keep buffers  $\text{cur}\mathbf{R}$ ,  $\text{cur}\mathbf{S}$  as the result of forward pass, and initialize gradient buffers  $\text{grad}\mathbf{R} = \mathbf{0}_{d \times M}$ ,  $\text{grad}\mathbf{S} = \mathbf{0}_M$ . Assuming that  $\nabla_{\mathbf{N}}\mathcal{L} \in \mathbb{R}^{L \times d}$ ,  $\nabla_{\mathbf{D}}\mathcal{L} \in \mathbb{R}^L$  are computed using automatic differentiation, iterate in a backward direction  $l = L - \mathcal{C} + 1, L - 2\mathcal{C} + 1, \dots, 1$  and compute

$$\text{cur}\mathbf{R} := \text{cur}\mathbf{R} - \sum_{l'=l}^{l+\mathcal{C}-1} \mathbf{V}_{l'} \times \tilde{\mathbf{K}}_{l'}^\top;$$

$$\text{cur}\mathbf{S} := \text{cur}\mathbf{S} - \sum_{l'=l}^{l+\mathcal{C}-1} \tilde{\mathbf{K}}_{l'};$$

$$\text{block}\mathbf{R} := \text{PS}((\mathbf{V}_{l+l'-1} \times \tilde{\mathbf{K}}_{l+l'-1}^\top)_{l'=1}^{\mathcal{C}});$$

$$\text{block}\mathbf{R} := (\text{cur}\mathbf{R} + \text{block}\mathbf{R}_{l'})_{l'=1}^{\mathcal{C}};$$

$$\text{block}\mathbf{S} := \text{PS}((\tilde{\mathbf{K}}_{l+l'-1})_{l'=1}^{\mathcal{C}});$$

$$\text{block}\mathbf{S} := (\text{cur}\mathbf{S} + \text{block}\mathbf{S}_{l'})_{l'=1}^{\mathcal{C}};$$

$$\nabla_{\tilde{\mathbf{Q}}_{l:l+\mathcal{C}-1}}\mathcal{L} := ((\nabla_{\mathbf{D}_{l+l'-1}}\mathcal{L}) \cdot \text{block}\mathbf{S}_{l'} + \text{cur}\mathbf{R}_{l'}^\top \times \nabla_{\mathbf{N}_{l+l'-1}}\mathcal{L})_{l'=1}^{\mathcal{C}};$$

$$\text{grad}\mathbf{R} := \text{grad}\mathbf{R} + \sum_{l'=l}^{l+\mathcal{C}-1} (\nabla_{\mathbf{N}_{l'}}\mathcal{L}) \times \tilde{\mathbf{Q}}_{l'}^\top;$$

$$\text{grad}\mathbf{S} := \text{grad}\mathbf{S} + \sum_{l'=l}^{l+\mathcal{C}-1} (\nabla_{\mathbf{D}_{l'}}\mathcal{L}) \cdot \tilde{\mathbf{Q}}_{l'};$$

$$\text{blockgrad}\mathbf{R} := \text{PS}(((\nabla_{\mathbf{N}_{l+l'-1}}\mathcal{L}) \times \tilde{\mathbf{Q}}_{l+l'-1}^\top)_{l'=1}^{\mathcal{C}});$$

$$\text{blockgrad}\mathbf{R} := (\text{grad}\mathbf{R} - \text{blockgrad}\mathbf{R}_{l'})_{l'=1}^{\mathcal{C}};$$

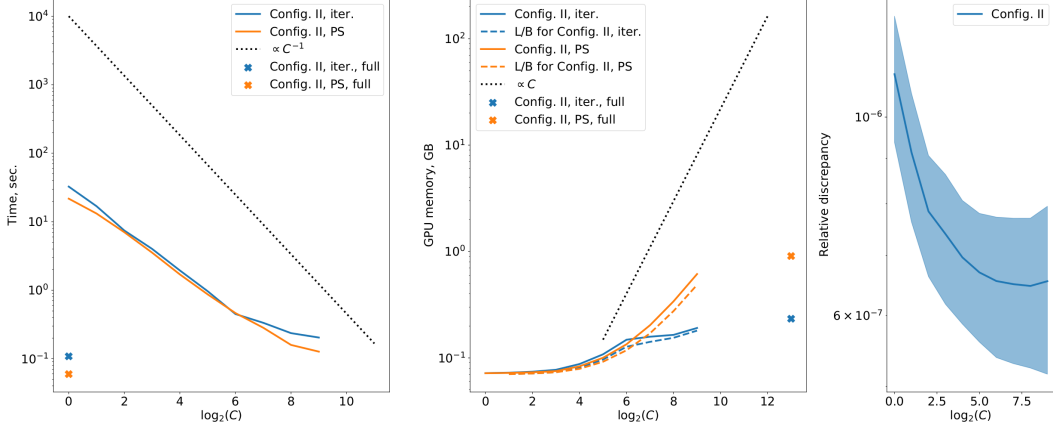

Figure 5: Version of Figure 2 for configuration I.

$$\begin{aligned}
 \text{blockgrad}\mathbf{S} &:= \text{PS}(((\nabla_{\mathbf{D}_{l+l'-1}}\mathcal{L}) \cdot \tilde{\mathbf{Q}}_{l+l'-1})_{l'=1}^C); \\
 \text{blockgrad}\mathbf{S} &:= (\text{grad}\mathbf{S} - \text{grad}\mathbf{S}_{l'})_{l'=1}^C; \\
 \nabla_{\mathbf{V}_{l:l+c-1}}\mathcal{L} &:= (\text{blockgrad}\mathbf{R}_{l'} \times \tilde{\mathbf{K}}_{l+l'-1})_{l'=1}^C; \\
 \nabla_{\tilde{\mathbf{K}}_{l:l+c-1}}\mathcal{L} &:= (\text{blockgrad}\mathbf{R}_{l'}^\top \times \mathbf{V}_{l+l'-1})_{l'=1}^C.
 \end{aligned}$$

Finally, it’s easy to see how to use both one-to-one and “block” iterative computation as part of Algorithm 1 to compute the update (7-8). For that, when doing a forward computation for some  $n, r$ , initialize  $\text{cur}\mathbf{R}, \text{cur}\mathbf{S}$  from corresponding subvectors of  $\mathbf{U}_{B_n-1}^{(r-1, n-1)}$ , with the rest of the algorithm unchanged. Similarly, during a backward pass for some  $n, r$ , initialize  $\text{grad}\mathbf{R}, \text{grad}\mathbf{S}$  from corresponding subvectors of  $\mathcal{G}^{(n)}$  and leave the rest of the iterative back-propagation algorithm unchanged.

## D Additional Experimental Details

We use 200K, 100K, 200K SGD iterations in the Copying Task, Penn Treebank, Enwik8 setups respectively. We use Adam optimizer [19] with  $\beta_1 = 0.9, \beta_2 = 0.999$  (default configuration used in PyTorch). For the Copying task, we train with a learning rate  $10^{-3}$  for 130K iterations and then decrease the learning rate to  $10^{-4}$ . We use a fixed learning rate of  $10^{-4}$  and  $2 \times 10^{-4}$  in Penn Treebank and Enwik8 experiments respectively.

Figure 5 is a version of Figure 2 for the configuration II. We draw the same conclusions to those reported in the main text. Figure 6 is a bigger version of Figure 4 from the main text. Figure 7 reports additional experimental results: Bits Per Character for the Copying Task and train set learning curves for Penn Treebank and Enwik8. Figure 8 is a version of Figure 4, showing a difference (–) between curves and the “Full” curve. We observe that memory-efficient algorithms result in a negligible loss of performance, which we attribute to numerical effects, accumulating with many thousands of iterations.

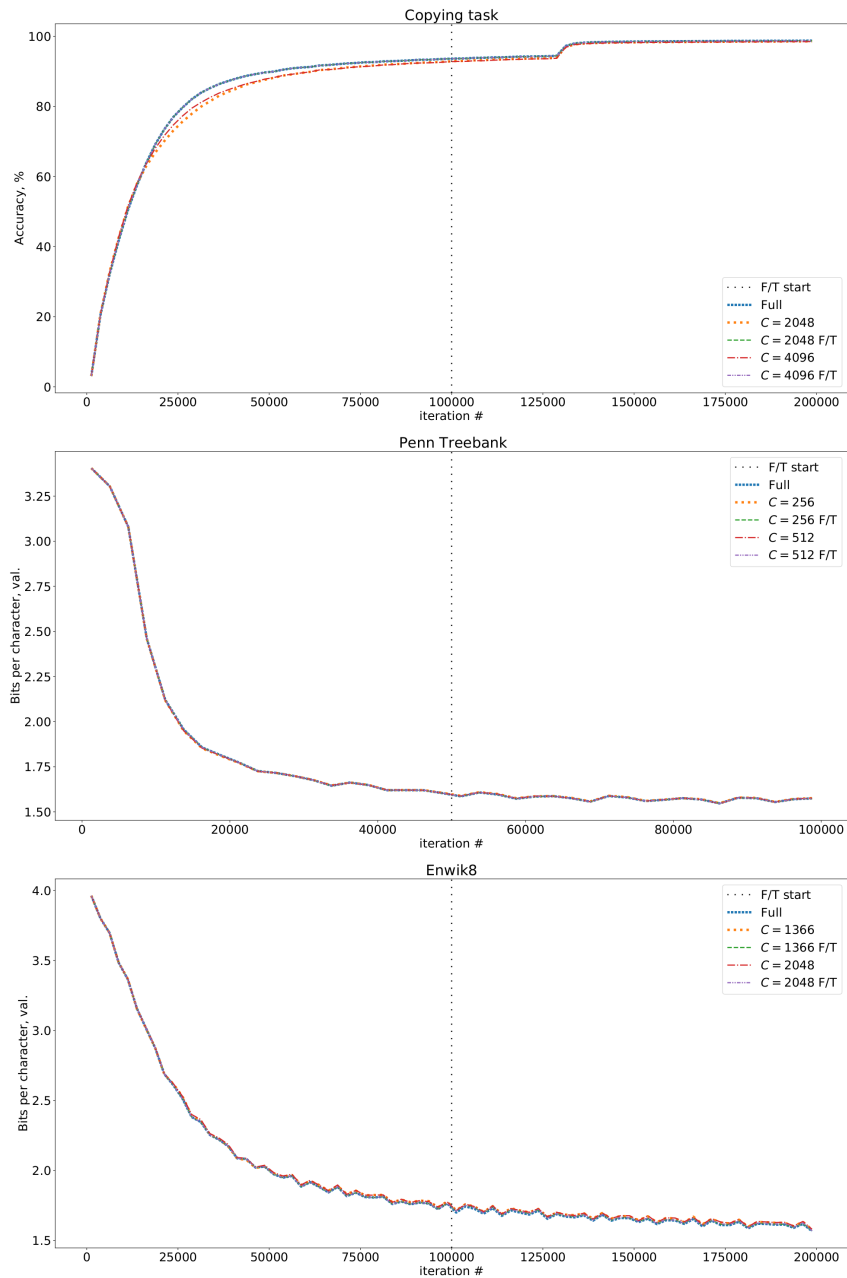

Figure 6: Bigger version of Figure 4.

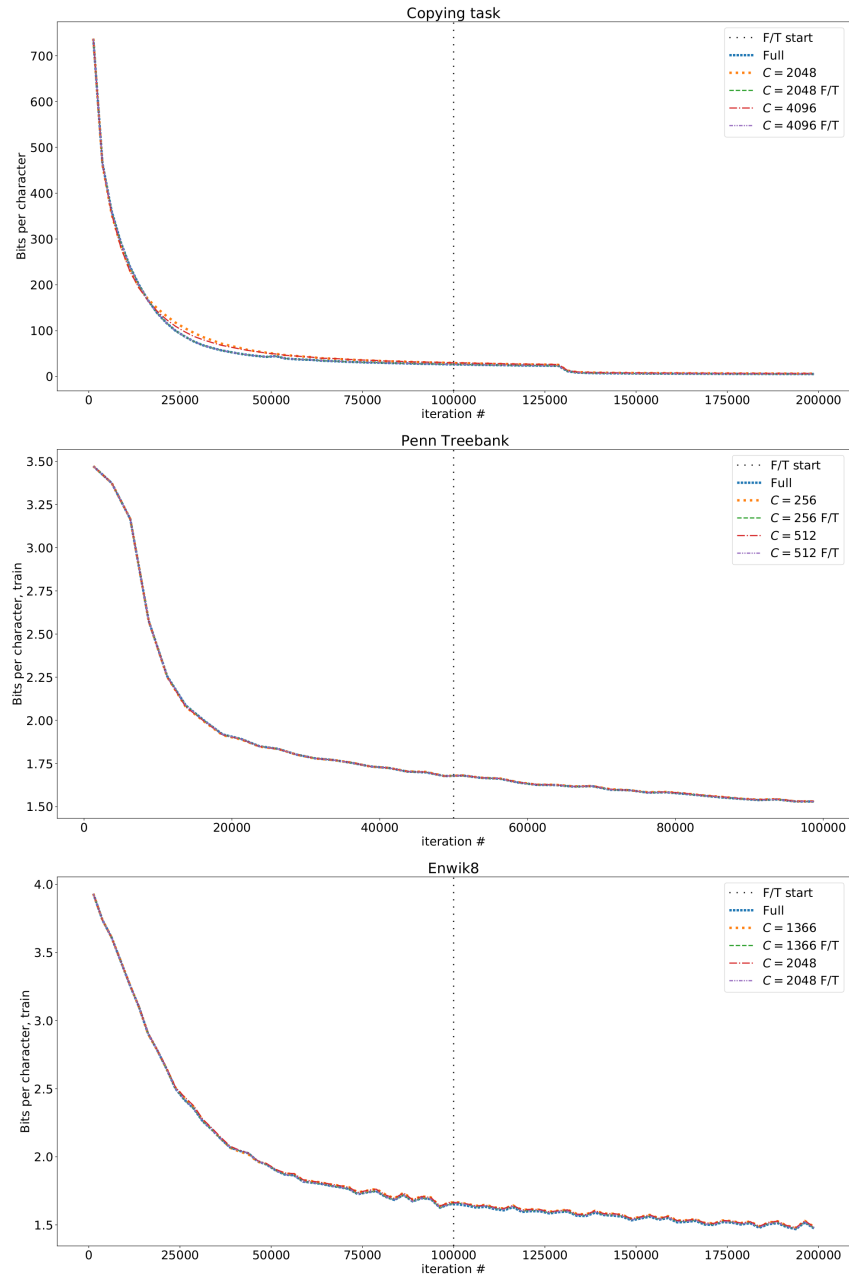

Figure 7: Bits-per-character learning curve for the Copying task and train-set learning curves for language modelling on Penn Treebank and Enwik8 respectively.

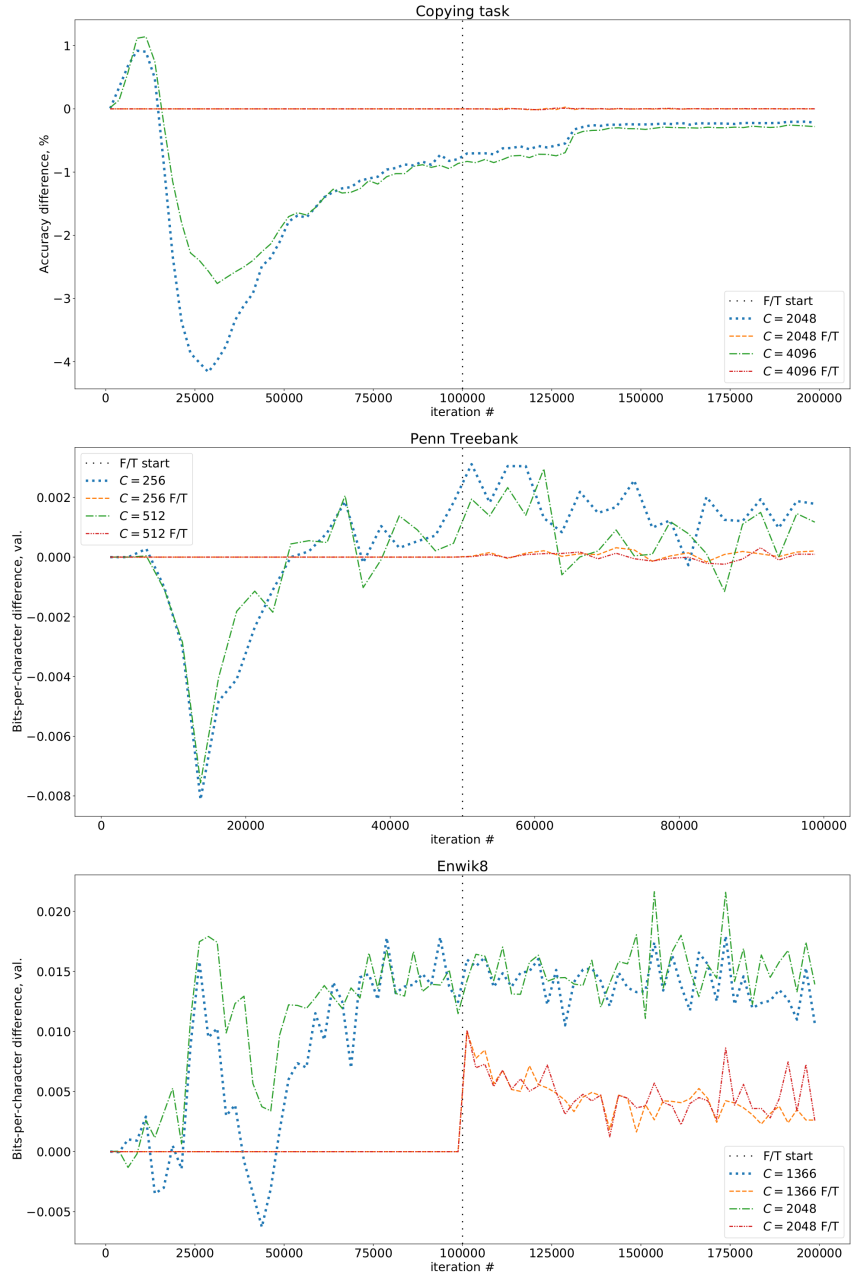

Figure 8: A difference (–) between curves and the “Full” curve from Figure 4.
